# Supplementary material for: Cav3.2 T-type calcium channels shape electrical firing in mouse Lamina II neurons
Source: PubMed Central journal article supplement (PMC6395820; doi:10.1038/s41598-019-39703-3), 2019-02-28
Supplement: 41598_2019_39703_MOESM2_ESM.pdf [file 41598_2019_39703_MOESM2_ESM.pdf]

## Supplementary Tables

### **Cav3.2 T-type calcium channels shape electrical firing in mouse Lamina II neurons**

**Miriam Candelas**<sup>1,2,3,4</sup>, **Ana Reynders**<sup>5</sup>, **Margarita Arango-Lievano**<sup>2,3,4</sup>, **Christoph Neumayer**<sup>1,2,3,4</sup>, **Antoine Fruquière**<sup>1,2,3,4</sup>, **Elsa Demes**<sup>1,2,3,4</sup>, **Jawed Hamid**<sup>6</sup>, **Céline Lemmers**<sup>1,2,3,7</sup>, **Claire Bernat**<sup>1,2,3,7</sup>, **Arnaud Monteil**<sup>1,2,3,4,7</sup>, **Vincent Compan**<sup>1,2,3,4</sup>, **Sophie Laffray**<sup>1,2,3,4</sup>, **Perrine Inquimbert**<sup>8</sup>, **Yves Le Feuvre**<sup>9</sup>, **Gerald W. Zamponi**<sup>6</sup>, **Aziz Moqrich**<sup>5</sup>, **Emmanuel Bourinet**<sup>1,2,3,4\*</sup>, **Pierre-François Méry**<sup>1,2,3,4\*</sup>

| <b>Supplementary Table 1 : antibodies for immunofluorescence experiments</b> |                |                 |                                                     |
|------------------------------------------------------------------------------|----------------|-----------------|-----------------------------------------------------|
| <b>Antigen</b>                                                               | <b>Species</b> | <b>Dilution</b> | <b>Supplier</b>                                     |
| <b>Primary antibodies</b>                                                    |                |                 |                                                     |
| GFP                                                                          | Chicken        | 1/250           | Invitrogen                                          |
| RFP-pAB                                                                      | Rabbit         | 1/500           | Medical & Biological Laboratories                   |
| Tlx3                                                                         | Guinea pig     | 1/20000         | Gift by Dr. Muller (Muller, Anlag et al. 2005)      |
| Pax2                                                                         | Rabbit         | 1/50            | Invitrogen                                          |
| NeuN                                                                         | Rabbit         | 1/1000          | Millipore                                           |
| Calbindin D-28k                                                              | Rabbit         | 1/1000          | Swant                                               |
| Calretinin                                                                   | Mouse          | 1/1000          | Swant                                               |
| PKC $\gamma$                                                                 | Guinea pig     | 1/700           | Frontier Institute                                  |
| PKC $\gamma$                                                                 | Rabbit         | 1/1000          | Santa Cruz Biotechnology                            |
| Parvalbumin                                                                  | Rabbit         | 1/1000          | Swant                                               |
| nNOS                                                                         | Sheep          | 1/3000          | Gift by Dr. Prevot (Herbison, Simonian et al. 1996) |
| Tlx3                                                                         | Rabbit         | 1/20000         | Gift by Dr. Muller (Muller, Anlag et al. 2005)      |
| NeuN                                                                         | mouse          | 1/1000          | Millipore                                           |
| <b>Secondary antibodies</b>                                                  |                |                 |                                                     |
| Anti chicken CF488                                                           | Donkey         | 1/500           | Sigma                                               |
| Anti guinea-pig A647                                                         | Goat           | 1/500           | Invitrogen                                          |
| Anti rabbit CF350                                                            | Donkey         | 1/500           | Biotum                                              |
| Anti rabbit Cy3                                                              | Goat           | 1/500           | Jackson                                             |
| Anti mouse A568                                                              | Goat           | 1/500           | Invitrogen                                          |
| Anti sheep A647                                                              | Donkey         | 1/500           | Invitrogen                                          |
| Anti rabbit Cy3                                                              | Goat           | 1/500           | Jackson                                             |
| Anti mouse A568                                                              | Goat           | 1/500           | Invitrogen                                          |
| Anti sheep A647                                                              | Donkey         | 1/500           | Invitrogen                                          |

## Supplementary Tables (continued)

| Supplementary Table 2: primer sequences used for in situ hybridization |        |                                                   |
|------------------------------------------------------------------------|--------|---------------------------------------------------|
| Gene                                                                   | Primer | Sequence (5' → 3')                                |
| <i>Cacnali</i>                                                         | F1     | AGCAGCCTGTCACTCACATC                              |
|                                                                        | R1     | GGTGTGAACTGTCCCCAAA                               |
|                                                                        | F2     | AGTTCAGCAGTACCAGCAGC                              |
|                                                                        | R2     | <b>TAATACGACTCACTATAGGGGT</b> CCCCCAAAGTGTTACGA   |
| <i>Cacnalg</i>                                                         | F1     | GCCAAGGACCCTCAAGAGAC                              |
|                                                                        | R1     | TGTAATACACTCACGGCCCC                              |
|                                                                        | F2     | AAGGACCCTCAAGAGACCAGA                             |
|                                                                        | R2     | <b>TAATACGACTCACTATAGGGC</b> CAGACGCTTTCGCCTCAAAA |
| <i>Cacnalh</i>                                                         | F1     | GGAAGGGCAGATAGATGACG                              |
|                                                                        | R1     | GTCTTATTGCATGGGCCAGT                              |
|                                                                        | F2     | CGGAGCCTGCTGAAAATATC                              |
|                                                                        | R2     | <b>TAATACGACTCACTATAGGGG</b> AAGGATGCCGAGTGATGATT |

Bold text : T7 promoter sequence

## Supplementary Tables (continued)

**Supplementary Table 3. Neurons and mice used for statistical analysis in Figures.**

| Figure        | Neuron type               | Nb of neurons | Nb of mice |
|---------------|---------------------------|---------------|------------|
| Figure 3C, 3D | Unidentified              | 12            | 8          |
| Figure 3G, 3H | Unidentified              | 12            | 4          |
| Figure 4B, 4C | Unidentified              | 124           | 56         |
| Figure 4F     | Unidentified              | 7             | 4          |
| Figure 4H     | Unidentified              | 101           | 56         |
| Figure 6A     | Cav3.2 mcherry            | 7             | 3          |
| Figure 6B, 6C | Unidentified              | 57            | 27         |
|               | Cav3.2 mcherry            | 32            | 23         |
| Figure 6D     | Cav3.2 mcherry            | 6             | 3          |
| Figure 6E-6H  | Cav3.2 mcherry            | 119           | 40         |
| Figure 6I-6K  | Cav3.2 mcherry            | 91            | 40         |
| Figure 8B-8D  | Cav3.2 mcherry            | 91            | 40         |
|               | Cav3.2 Cre mcherry        | 33            | 11         |
| Figure 8E     | Cav3.2 Cre mcherry        | 36            | 11         |
| Figure 8G, 8H | Cav3.2 mcherry            | 34            | 23         |
|               | Cav3.2 Cre mcherry        | 5             | 4          |
| Figure 8I     | Cav3.2 Cre mcherry        | 32            | 11         |
| Figure 8J, 8K | Cav3.2 Cre mcherry        | 36            | 11         |
| Figure 9A-9C  | Cav3.2 mcherry Cav3.1 -/- | 28            | 9          |
|               | Cav3.2 mcherry            | 32            | 23         |
| Figure 9E     | Cav3.2 mcherry Cav3.1 -/- | 8             | 6          |
| Figure 9F     | Cav3.2 mcherry Cav3.1 -/- | 7             | 6          |
| Figure 9G     | Cav3.2 mcherry Cav3.1 -/- | 28            | 9          |
| Figure 9H, 9I | Cav3.2 mcherry Cav3.1 -/- | 12            | 8          |
|               | Cav3.2 mcherry            | 32            | 23         |
|               | Cav3.2 Cre mcherry        | 5             | 4          |
| Figure 9J     | Cav3.2 mcherry Cav3.1 -/- | 28            | 9          |

**Supplementary Table 4. Neurons and mice used for statistical analysis in supplementary Figures.**

| Figure           | Neuron type  | Nb of neurons | Nb of mice |
|------------------|--------------|---------------|------------|
| Sup. Fig. 3A, 3B | Unidentified | 9             | 5          |
| Sup. Fig. 3C, 3D | Unidentified | 9             | 5          |
| Sup. Fig. 3E, 3F | Unidentified | 5             | 3          |
| Sup. Fig. 4D     | Unidentified | 19            | 12         |
| Sup. Fig. 4E     | Unidentified | 8             | 8          |
| Sup. Fig. 5B     | Unidentified | 14; 16        | 25         |
| Sup. Fig. 5C-5E  | Unidentified | 9; 14         | 18         |
| Sup. Fig. 6C     | Unidentified | 134           | 56         |

**Supplementary Table 5. Parameters of the firing patterns in Cav3.2-expressing neurons.**

| Electrophysiological parameter |               |            |                              |                  |              |
|--------------------------------|---------------|------------|------------------------------|------------------|--------------|
| Firing patterns                | Rheobase (pA) | Nb AP      | 1 <sup>st</sup> Latency (ms) | Firing time (ms) | SD IeI (ms)  |
| <b>Single Spiking (8)</b>      | 61.9 ± 9.3    | 1.8 ± 0.2  | 317.6 ± 161.1                | 487.6 ± 224.6    | 83.8 ± 60.6  |
| <b>Transient (7)</b>           | 82.1 ± 20.9   | 14 ± 5.7   | 23.2 ± 5.2                   | 428.4 ± 158.7    | 16.8 ± 4.7   |
| <b>Irregular tonic (15)</b>    | 72.1 ± 21.7   | 15.1 ± 1.8 | 40.9 ± 7.1                   | 1705.8 ± 86.9    | 135.5 ± 48.4 |
| <b>Regular tonic (14)</b>      | 35.4 ± 4.0    | 20.4 ± 2.1 | 64.0 ± 6.1                   | 1891.9 ± 37      | 38.7 ± 11.7  |
| <b>Delayed (30)</b>            | 39.7 ± 2.7    | 21.2 ± 1.9 | 169.5 ± 12.5                 | 1872.9 ± 54.6    | 57.6 ± 11.2  |
| <b>Gap (17)</b>                | 56.2 ± 5.4    | 13.2 ± 1.8 | 315.5 ± 37.2                 | 1790.9 ± 99.6    | 111.7 ± 20.1 |

Data are expressed as mean ± SEM. Numbers of neurons are within brackets. Nb AP: number of action potentials elicited during a 2s-step current pulse, SD IeI, standard deviation of the intervals between action potentials elicited during a 2s-step current pulse.

**Supplementary Table 6. Properties of the action potential in Cav3.2-expressing neurons.**

| Electrophysiological parameter |                |            |             |             |           |
|--------------------------------|----------------|------------|-------------|-------------|-----------|
| Firing patterns                | Threshold (mV) | Peak (mV)  | AHP (mV)    | hWidth (ms) | TTP (ms)  |
| <b>Single Spiking (8)</b>      | -37.3 ± 3.4    | 13.0 ± 2.1 | -46.8 ± 2.9 | 0.86 ± 0.10 | 2.6 ± 0.9 |
| <b>Transient (7)</b>           | -36.0 ± 2.0    | 17.8 ± 3.6 | -46.1 ± 2.1 | 0.96 ± 0.11 | 1.8 ± 0.5 |
| <b>Irregular tonic (15)</b>    | -36.9 ± 1.6    | 12.1 ± 2.4 | -47.2 ± 1.7 | 0.92 ± 0.08 | 2.2 ± 0.3 |
| <b>Regular tonic (14)</b>      | -37.7 ± 1.1    | 10.5 ± 2.1 | -54.0 ± 0.9 | 0.74 ± 0.04 | 2.1 ± 0.3 |
| <b>Delayed (30)</b>            | -32.0 ± 0.7    | 10.0 ± 1.1 | -49.7 ± 0.7 | 0.82 ± 0.05 | 1.9 ± 0.2 |
| <b>Gap (17)</b>                | -31.7 ± 0.9    | 13.8 ± 2.3 | -51.0 ± 1.6 | 0.77 ± 0.02 | 1.9 ± 0.3 |

Data are expressed as mean ± SEM. Numbers of neurons are within brackets. AHP: afterhyperpolarization; hWidth: half-width of the action potential; TTP, time-to-peak.

**Supplementary Table 7. Significant effects of Cav3.2 ablation on the excitability of LII neurons classified according to subthreshold properties.**

|                                   | Cav3.2-mcherry | Cav3.2-Cre-mcherry | Mann Whitney test |
|-----------------------------------|----------------|--------------------|-------------------|
| <b>Rebound-exhibiting neurons</b> | <b>(31)</b>    | <b>(5)</b>         |                   |
| Peak (mV)                         | 12.9 ± 1.6     | 18.8 ± 1.5         | p=0.01            |
| After-hyperpolarisation (mV)      | -49.2 ± 1.3    | -56.5 ± 1.4        | p=0.002           |
| Time-to-peak (ms)                 | 2.57 ± 0.29    | 1.24 ± 0.4         | p=0.03            |
| Half-Width (ms)                   | 0.87 ± 0.04    | 0.67 ± 0.04        | p=0.006           |
| Activity time (ms)                | 1390 ± 136     | 1826 ± 47          | p=0.005           |
| <b>Hyperpolarizing neurons</b>    | <b>(29)</b>    | <b>(8)</b>         |                   |
| Peak (mV)                         | 10.6 ± 1.1     | 17.6 ± 3.4         | p=0.02            |
| Activity time (ms)                | 1753 ± 84      | 1928 ± 201         | p=0.04            |
| <b>Passive neurons</b>            | <b>(31)</b>    | <b>(21)</b>        |                   |
| Threshold (mV)                    | -32.2 ± 0.7    | -29.5 ± 0.9        | p=0.04            |

Data are expressed as mean ± SEM. Numbers of neurons are within brackets. Data are shown when p<0.05, as a result of the Mann Whitney test between the two populations of Cav3.2-mcherry positive neurons.
